# Supplementary material
Source: Research Square preprint supplement (doi:10.21203/rs.3.rs-6801898/v1)
Supplement: Supplementary file 1 [file 7c9d7ffb486228be93b9f4fe.docx]

***NOMAD instrument for dealing with complex psycho-medico-social situations(PMS-C)***

Dealing with psycho-medico-social situations requires a change in the way I work.

| Not at all |  |  |  | Exactly |
| --- | --- | --- | --- | --- |
| 1 | 2 | 3 | 4 | 5 |
|  |  |  |  |  |

Explain

……………………………………………………………………………………………………………………………………………………………………………………………………

Health center workers agree on the goal of addressing PMS-C situations at the health center level.

| Not at all |  |  |  | Exactly |
| --- | --- | --- | --- | --- |
| 1 | 2 | 3 | 4 | 5 |
|  |  |  |  |  |

Explain

……………………………………………………………………………………………………………………………………………………………………………………………………

It's clear what the HC's handling of PMS-C situations requires of me

| Not at all |  |  |  | Exactly |
| --- | --- | --- | --- | --- |
| 1 | 2 | 3 | 4 | 5 |
|  |  |  |  |  |

Explain

……………………………………………………………………………………………………………………………………………………………………………………………………

The HC's handling of PMS-C situations brings clear added value to my work.

| Not at all |  |  |  | Exactly |
| --- | --- | --- | --- | --- |
| 1 | 2 | 3 | 4 | 5 |
|  |  |  |  |  |

Explain

…………………………………………………………………………………………………………………………………………………………………………………………………

Health area leaders are the driving force behind the HC's handling of PMS-C situations.

| Not at all |  |  |  | Exactly |
| --- | --- | --- | --- | --- |
| 1 | 2 | 3 | 4 | 5 |
|  |  |  |  |  |

Explain

……………………………………………………………………………………………………………………………………………………………………………………………………

The health center and health zone authorities are the driving force behind the health center's handling of PMS-C situations.

| Not at all |  |  |  | Exactly |
| --- | --- | --- | --- | --- |
| 1 | 2 | 3 | 4 | 5 |
|  |  |  |  |  |

Explain

……………………………………………………………………………………………………………………………………………………………………………………………………

I agree that the handling of PMS-C situations by the HC is part of my job.

| Not at all |  |  |  | Exactly |
| --- | --- | --- | --- | --- |
| 1 | 2 | 3 | 4 | 5 |
|  |  |  |  |  |

Explain

……………………………………………………………………………………………………………………………………………………………………………………………………

I agree that the HC should take charge of PMS-C situations.

| Not at all |  |  |  | Exactly |
| --- | --- | --- | --- | --- |
| 1 | 2 | 3 | 4 | 5 |
|  |  |  |  |  |

Explain

……………………………………………………………………………………………………………………………………………………………………………………………………

I will continue to support this care even after the HC has been handling PMS-C situations for some time.

| Not at all |  |  |  | Exactly |
| --- | --- | --- | --- | --- |
| 1 | 2 | 3 | 4 | 5 |
|  |  |  |  |  |

Explain

……………………………………………………………………………………………………………………………………………………………………………………………………

I perform the activities required to manage PMS-C situations.

| Not at all |  |  |  | Exactly |
| --- | --- | --- | --- | --- |
| 1 | 2 | 3 | 4 | 5 |
|  |  |  |  |  |

Explain

……………………………………………………………………………………………………………………………………………………………………………………………………

I have confidence in the work and skills of other HC members in handling PMS-C situations.

| Not at all |  |  |  | Exactly |
| --- | --- | --- | --- | --- |
| 1 | 2 | 3 | 4 | 5 |
|  |  |  |  |  |

Explain

……………………………………………………………………………………………………………………………………………………………………………………………………

The activities involved in the handling of PMS-C situations by the HC are divided equally among the various HC members.

| Not at all |  |  |  | Exactly |
| --- | --- | --- | --- | --- |
| 1 | 2 | 3 | 4 | 5 |
|  |  |  |  |  |

Explain

……………………………………………………………………………………………………………………………………………………………………………………………………

HC is adequately supported in organizing the handling of PMS-C situations by the authorities.

| Not at all |  |  |  | Exactly |
| --- | --- | --- | --- | --- |
| 1 | 2 | 3 | 4 | 5 |
|  |  |  |  |  |

Explain

……………………………………………………………………………………………………………………………………………………………………………………………………

I have the information needed to assess the effects of the HC's handling of PMS-C situations.

| Not at all |  |  |  | Exactly |
| --- | --- | --- | --- | --- |
| 1 | 2 | 3 | 4 | 5 |
|  |  |  |  |  |

Explain

……………………………………………………………………………………………………………………………………………………………………………………………………

The health center team finds that the HC's handling of PMS-C situations is worthwhile.

| Not at all |  |  |  | Exactly |
| --- | --- | --- | --- | --- |
| 1 | 2 | 3 | 4 | 5 |
|  |  |  |  |  |

Explain

……………………………………………………………………………………………………………………………………………………………………………………………………

The health center team modifies its work in response to the assessment of PMS-C situations.

| Not at all |  |  |  | Exactly |
| --- | --- | --- | --- | --- |
| 1 | 2 | 3 | 4 | 5 |
|  |  |  |  |  |

Explain

……………………………………………………………………………………………………………………………………………………………………………………………………

***NoMAD TOOL CENTERED ON THE EVOLUTION OF THE PMS APPROACH AT THE HEALTH CENTER LEVEL***

***Level of participation or adherence to the approach***

To what extent do you appropriate this different way of providing care in your daily practice? (1.4)

| Not at all | Little convinced | More or less | Convinced | Exactly |
| --- | --- | --- | --- | --- |
| 1 | 2 | 3 | 4 | 5 |
|  |  |  |  |  |

Explain

……………………………………………………………………………………………………………………………………………………………………………………………………

Has this approach become an ordinary activity in care practice? (4.4)

| Not at all | Little convinced | More or less | Convinced | Exactly |
| --- | --- | --- | --- | --- |
| 1 | 2 | 3 | 4 | 5 |
|  |  |  |  |  |

Explain

……………………………………………………………………………………………………………………………………………………………………………………………………

Can this PMS approach become the equivalent of MAP at the HC level? (2.3)

| Not at all | Little convinced | More or less | Convinced | Exactly |
| --- | --- | --- | --- | --- |
| 1 | 2 | 3 | 4 | 5 |
|  |  |  |  |  |

Explain

……………………………………………………………………………………………………………………………………………………………………………………………………

***The importance of the approach in the context of the health center***

Dealing with complex psycho-medico-social situations calls for a change in the way the health center works. (1.1)

| Not at all | Little convinced | More or less | Convinced | Exactly |
| --- | --- | --- | --- | --- |
| 1 | 2 | 3 | 4 | 5 |
|  |  |  |  |  |

Explain

……………………………………………………………………………………………………………………………………………………………………………………………………

The health center team and people in PMS-C situations evaluate the implementation of the PMS approach in the health center (4.1)

| Not at all | Little convinced | More or less | Convinced | Exactly |
| --- | --- | --- | --- | --- |
| 1 | 2 | 3 | 4 | 5 |
|  |  |  |  |  |

Explain

……………………………………………………………………………………………………………………………………………………………………………………………………

People in PMS-C situations are satisfied with the implementation of the PMS approach at HC (4.4)

| Not at all | Little convinced | More or less | Convinced | Exactly |
| --- | --- | --- | --- | --- |
| 1 | 2 | 3 | 4 | 5 |
|  |  |  |  |  |

Explain

……………………………………………………………………………………………………………………………………………………………………………………………………

***Stability factors in the PMS approach***

The interest shown in the PMS approach by HC agents is easily perceived by you (1.2)

| Not at all | Little convinced | More or less | Convinced | Exactly |
| --- | --- | --- | --- | --- |
| 1 | 2 | 3 | 4 | 5 |
|  |  |  |  |  |

Explain

……………………………………………………………………………………………………………………………………………………………………………………………………

HC staff are motivated to implement the MAP through the PMS approach in HC activities(4.2)

| Not at all | Little convinced | More or less | Convinced | Exactly |
| --- | --- | --- | --- | --- |
| 1 | 2 | 3 | 4 | 5 |
|  |  |  |  |  |

Explain

……………………………………………………………………………………………………………………………………………………………………………………………………

Involvement of local and health zone authorities enables the PMS approach to be implemented at the health center (2.2).

| Not at all | Little convinced | More or less | Convinced | Exactly |
| --- | --- | --- | --- | --- |
| 1 | 2 | 3 | 4 | 5 |
|  |  |  |  |  |

Explain

……………………………………………………………………………………………………………………………………………………………………………………………………

***Personal involvement in implementing the PMS approach***

Management of PMS-C situations at the HC is understood by HC agents (1.2)

| Not at all | Little convinced | More or less | Convinced | Exactly |
| --- | --- | --- | --- | --- |
| 1 | 2 | 3 | 4 | 5 |
|  |  |  |  |  |

Explain

……………………………………………………………………………………………………………………………………………………………………………………………………

I understand the role of the health center in implementing the PMS approach (2.3) (1.3)

| Not at all | Little convinced | More or less | Convinced | Exactly |
| --- | --- | --- | --- | --- |
| 1 | 2 | 3 | 4 | 5 |
|  |  |  |  |  |

Explain

……………………………………………………………………………………………………………………………………………………………………………………………………

I support the implementation of PMS activities as an expression of the MAP at the HC level (2.4)

| Not at all | Little convinced | More or less | Convinced | Exactly |
| --- | --- | --- | --- | --- |
| 1 | 2 | 3 | 4 | 5 |
|  |  |  |  |  |

Explain

……………………………………………………………………………………………………………………………………………………………………………………………………

I know how to apply the PMS approach to HC care (3.1)

| Not at all | Little convinced | More or less | Convinced | Exactly |
| --- | --- | --- | --- | --- |
| 1 | 2 | 3 | 4 | 5 |
|  |  |  |  |  |

Explain

……………………………………………………………………………………………………………………………………………………………………………………………………

HC agents share their expertise in implementing the PMS approach (3.2)

| Not at all | Little convinced | More or less | Convinced | Exactly |
| --- | --- | --- | --- | --- |
| 1 | 2 | 3 | 4 | 5 |
|  |  |  |  |  |

Explain

……………………………………………………………………………………………………………………………………………………………………………………………………

***Events outside the project that may influence it***

Health area leaders support the Health Center team in implementing the PMS approach (2.2)

| Not at all | Little convinced | More or less | Convinced | Exactly |
| --- | --- | --- | --- | --- |
| 1 | 2 | 3 | 4 | 5 |
|  |  |  |  |  |

Explain

……………………………………………………………………………………………………………………………………………………………………………………………………

The HC team is supported in implementing the PMS approach at HC (3.4)

| Not at all | Little convinced | More or less | Convinced | Exactly |
| --- | --- | --- | --- | --- |
| 1 | 2 | 3 | 4 | 5 |
|  |  |  |  |  |

Explain

……………………………………………………………………………………………………………………………………………………………………………………………………

Implementation of the PMS approach is perceived as a different way of presenting the MAP (4.4)

| Not at all | Little convinced | More or less | Convinced | Exactly |
| --- | --- | --- | --- | --- |
| 1 | 2 | 3 | 4 | 5 |
|  |  |  |  |  |

Explain

……………………………………………………………………………………………………………………………………………………………………………………………………

Health authorities support the implementation of the PMS approach at HC (3.4)

| Not at all | Little convinced | More or less | Convinced | Exactly |
| --- | --- | --- | --- | --- |
| 1 | 2 | 3 | 4 | 5 |
|  |  |  |  |  |

Explain

……………………………………………………………………………………………………………………………………………………………………………………………………

The effects of PMS management are reported by PMS-C patients (4.1)

| Not at all | Little convinced | More or less | Convinced | Exactly |
| --- | --- | --- | --- | --- |
| 1 | 2 | 3 | 4 | 5 |
|  |  |  |  |  |

Explain

……………………………………………………………………………………………………………………………………………………………………………………………………

The health zone management team considers it a priority to implement the PMS approach at the HC (2.2)

| Not at all | Little convinced | More or less | Convinced | Exactly |
| --- | --- | --- | --- | --- |
| 1 | 2 | 3 | 4 | 5 |
|  |  |  |  |  |

Explain

……………………………………………………………………………………………………………………………………………………………………………………………………
